# Supplementary material for: Role of Phytochromes in Red Light-Regulated Alternative Splicing in Arabidopsis thaliana: Impactful but Not Indispensable
Source: MDPI journal article supplement (doi:10.3390/cells12202447), 2023-10-13
Supplement: s1 [file s1]

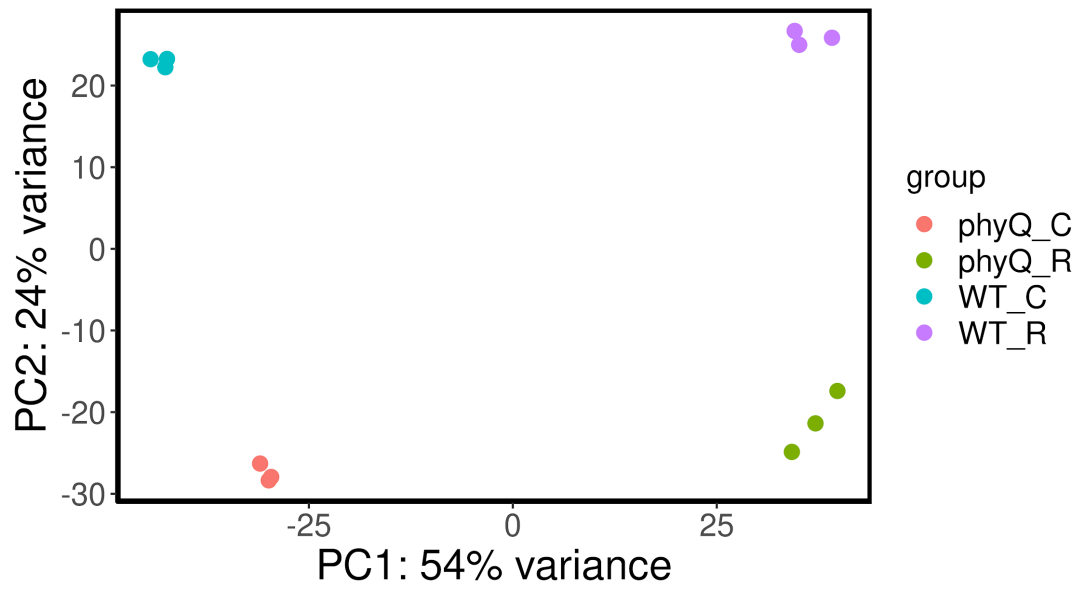

**Supplementary Figure S1:** Principal component analysis of all biological replicates. The analysis was performed using the normalized read counts. phyQ\_C: *phyQ* Dark control; phyQ\_R: *phyQ* R treatment; WT\_C: wild-type (Col-0) Dark control; WT\_R: wild-type (Col-0) R treatment.

(a)

WT

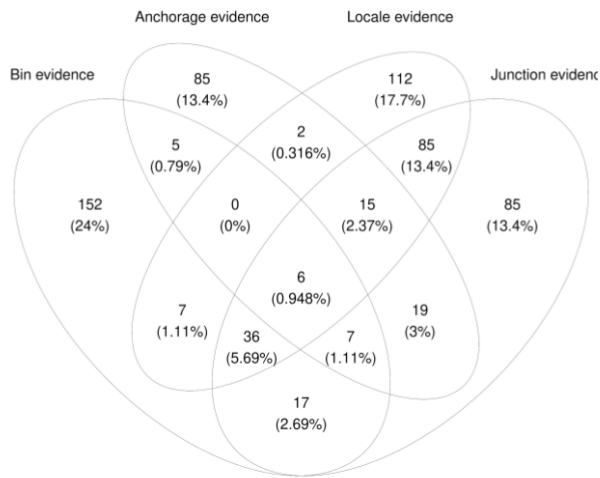

(b)

phyQ

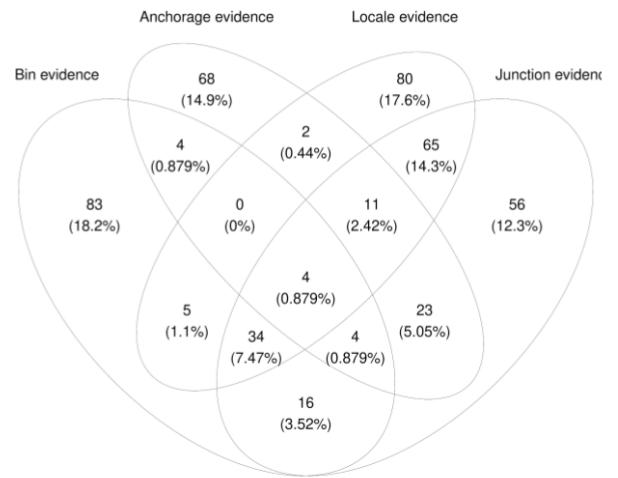

**Supplementary Figure S2:** Differentially spliced events by type of ASpli supporting evidence. Bin evidence refers to events where there is differential bin coverage between treatment, while anchorage, locale and junction evidence refers to events where there is differential junction use. Type of evidence for the contrasts between (a) WT dark vs WT red light and (b) *phyQ* D vs *phyQ* R light are shown.

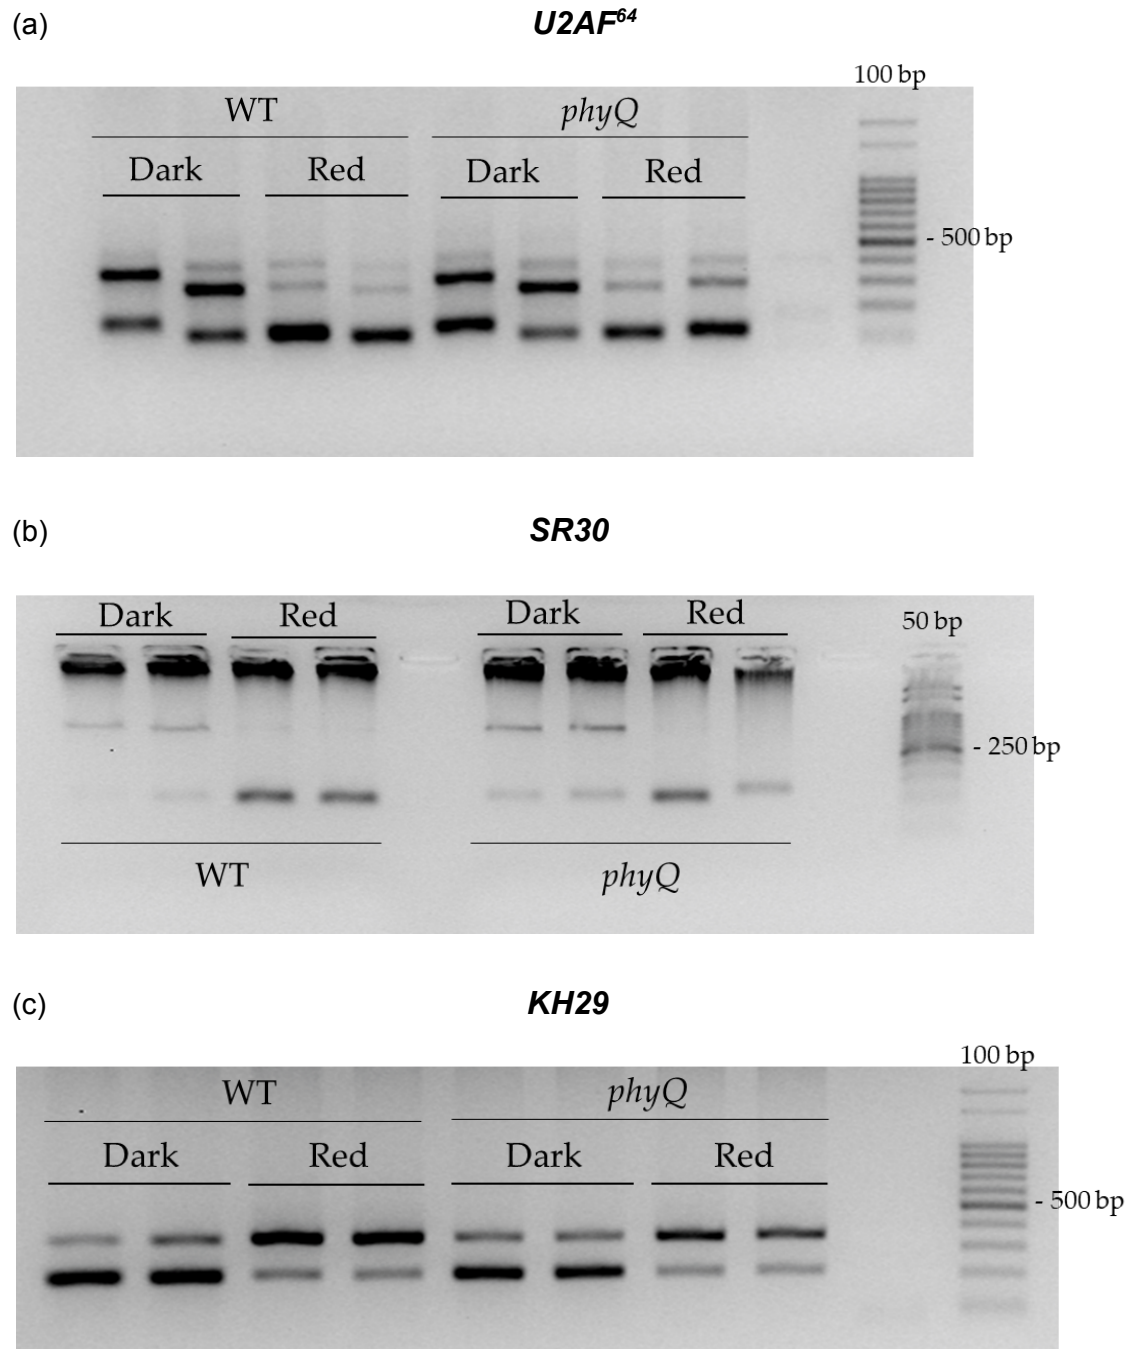

**Supplementary Figure S3:** Complete PCR electrophoresis gel of light regulated genes. (a) *U2AF<sup>64</sup>* (AT4G36690), (b) *SR30* (AT1G09140) and (c) *KH29* (AT5G56140). Two biological replicates are shown side by side. The order of the samples is WT dark, WT red light, *phyQ* dark and *phyQ* red light. In all cases there is a 100pb ladder.

TCTGAATTCGAAGATCACGAGGAAACGGTACGGTTGCTGACGCGATTACGACGAAGAGAAATGGTGGCCGACGGCGAAATCGAGGATCAATTGGACTCGAAACCCAAGAGAGATCGCGTGACCATGAAAGAGAGACATCAAGAAGTAAAGATAGAGAAAGAGAGAAGGGTCTGTATAAGGACAGAGAAAGAGACTCTGAAGTCTCTCGCCGAAGCAGGGATAGAGATGAGAGAAAAAGCAAGGAGAGGAGTAGAGACAAAGACAGAGATCATCGTGAGCGTCATCACAGAAGTAGTCGTACAGGGGATCATAGCAGGGAGCGTGGTGAAAGAAGAGAACGTCGGGTAGGGATGATGATGATTACCGTCGAAGCCGTGATCGTGACCATGATAGGCGGAGAGATGATAGAGGAGGAAGAGCGAGTCGTGATCTCGATCTCGTTCAAAGGATAGATCTGACGCAGAACAAAGGTCACGATCTCCATCGAAAAGTAAGCAGCGAGTCAGTGGATTGATATGGCACCTCCAGCCTCTGCAATGTTAGCTGCTGGTGCTGCTGTACAGGCCAAGTTCTCCCGCTCCACCAACTCTTCTGGGGCTGGAATGTTTCCCAACATGTTTCCATTGCCGACTGGACAGTCATTTGGGGGACTCTCTATGATGCCAATTACAGGCTATGACACAGCAGCTCAACTAGACATGCTCGCAGACTCTATGTCGGTGGGCTTCCCTACCGGCAATGAACAGTCGTGGCTACATTTTTAGTCAAGTTATGGCTGCTGTGGTGGAACCACTGCTGGTCCAGGTGATCGAGTTGTTAATGTCTACATAACCAACACGAGAAGGTTGCACTTTGTGGAGATGGAGCTGTTGAAGAGCAAGTAACGCTAGTCTGTTGGATGGGATATATTTAGGGAGCTCCGGTGAAAGGTGAGGAGACCTAGTGACTATAACCAATCTTAGCTGCGACTCTTGCTCAAGCCAGCCAGTCCCATCTAAACTAGTCTGTTGGTCTGACTCCAAGTCTCTGGTGGGCTTGAGGGACCAGATCGTATTTTTGTTGGTGACTTCCATATTACTTACGGAATCACAAGTGAGGGAGTTGTTGGAGTCTTTGGAGGCCTCAAGGGCTTGATCTTGTAAGAGATCGAGAACAGGGAACTCTAAAGGATATGCCTTTGTGTGTACCAAGATCTTCTGTTACAGATATCGCGTGCCTGCCCTAAATGGTATCAAGATGGGAGATAAGACTCTTACAGTGAGACGTGCCAACAGGGAACATGCTACAAAAGCCTGAACAAGAGAACGTATTATTGCATGCACAGCAGCAAATAGCTTTTACAGGGGTTATGTTACAGCCTGGTGCAGTGGCAACCACTGTGGTGCTGCTGACTCAAGTTGTTACTGAGGATGAGCTTAGAGATGATGAGGAGTATGGAGATATAATGGAAGACATGAGACAGGAAGGCGGAAAGTTTGGTAAGAGACCTCTTAATTGCGCAATATGGTCTATTTTGAATATAAGATTAAGAGCATATTGATCTGTCTCTGTTTTCTTGGTTGTGCTGTTTACAGCCTTTTGCTAIAAGAATCAGCCCTAACATACACAGACAGGAGACTGCATAAACCTCCTAATCTATTATACCAATGGCCACTATTTCTTAAAAAGAAAAAAGTGAAGTGTGTTTTGTCTGTGTTTTCTGTTGTTGATTCGAAATGTTTTGTTCTTTAACTCTTAAAAATGCAGGTGCTTTGACCAATGTTGTGATTCCGCGTCCAAGCCCCAATGGTGAGCCAGTGGCAGGCCTTGGCAAGGTTGTTTGAAGTATCCCGATACAGATGGCTCGACTAGGCCAAGTCCGGATGAATGGTAGGAAATTTGGAGGAAATGAAGTCGTTGCAGTGTATTACCTGAAGACAAGTTTGAACAGGGTGATTGGAGCCTGATCACTCTTTGTTGCTTATTAATCTTAAAGTTAAGTACTTTGCTTCAGTTTCAAGACCCCTTTGCGTGATTGTAAGAGATGAGATTATCGACACGTTGCTATTATAACGTTTTTATCTCATATCTTTGGTCTATTTCTAAAA

AACGGTGGTGTGCTCTCTTCCAGAACAATCTAACGCTTCTCGAACATCTTCTTCTTCTTCTCGAAATTATTTTCCAGTAATCAATTTCTTCTCTAGATTTTACAGG  
 AACTAATTTTCTGCTCTGAGGTATCAGATGAGTAGCCGATGGAATCGTACGATCTACGTGGGAATTGCGTGAGATATTCGAAGTGTGAGGTGAAGATCTCTTACAAGTA  
 TGGACCAATTGTGGACATTGATTGAAGATTCACCGAGACCTCTCGTTATGCTTTGTGCGAGTTGAAGATCCTCGTGATGCAGACGATGCAATTTATGGACGTGATGGTTAT  
 ATTTTGATGGGTGTCGACTTCGGGTTGAGATTGCACATGGTGGTCGTAGATTTTACCATCAGTTGATAGGTACAGCAGCAGCTACAGTGCAGCCGTGCACCTTCAAGACGCTCT  
 GACTACCGCGTGCTTGTGACCGGATTACCGCCTCTGCTTCGTGGCAGGACCTTAAGGATCACATGCGCAAAGCTGGAGATGCTGCTTCTCTGAAGTTTCCCTGACCGTAAAGG  
 CATGCTGGGGTTGGGATTATAGCAACTATGATGATAGAGTACGCAATAAGGAAATCTAGTGCCATGAATTTGCAAACTGCTTCTAGTGCTTATATACGGGTGAGGGAAT  
 ATGAGTCGAGGAGTGTGAGTCGAAGCCAGATGATTTCTAAAGGATATAAGACAGGAGTCGGAGCCGTGGTCCAAAGCTGTAGCTATAGTAGCAAGACGAGGAGTGTGTCACCTGCT  
 AGATCCATTTCCCCGCGTTACAGGCCCTTAGTCGTTCTCGCTATACAGCTCTGTCTCAAGATCTGGCTCACTGCTACGAGTGGGGATTGGATCTAGATGGGTATCTAGA  
 TGGATTCTGGACTGGATTACAAAGCTGGATTAGCATGAACCTGAACCTCTGTTTTACGGTCTGGTCTGGTCTGGTACTCCGCGGTATCAGCTGTAGGATCTGATCGCAAAGT  
 TTTGGACTATGATTACTCTGATTCTCAATATATTATCTTTTGACAATAGTGAGTCTGTGTTGAGTCTTTCTAGGACAGCATTAAAGCTCCCGGGACTAGATGGGAGATGG  
 TCAGTAAATTTCTTGTTATGCCACACTACATGGGGTTTTTGGTCTGTCTGCAAGTCCCAATCAAGATCAAAATCAAGATCAAGATCAAGATCGAATTTCCAGTTTACCTGTG  
 ATATCTGGTTGAAATGAAAACTGGCCACTGGCTGTACCCGAATCGTCTCAAGCTCTTCAAGCTCCACTGAAATAGAATTTGATTCCGATTGGGATTATTATACTGGTCTCTT  
 GTATGGGACGACCAATATGCTCTTCTAGTTTAGTTGAACCTGGAATGGTCTGTTATGTGCTATTAAAGACCGGAAACTCTGCTCGGCTGCATAAAGTTTATCAGAC  
 ATTTGTTTGGGTGTGGTAGGTTTTTTCATACATATACATTACACTACTGGTGTCTTTATGATTATCTTAAACTAACTTGCAGTGTTTAAACTA

TAGAGAGACAACAACAGCTTTGGTCTTGCCCTCCGCCGCTTCTTCTTCTTCTAATCTCCGACAGATTACTCTGATTCTGTTGTCTTCGAGATGATGATGATGTCGTCGCTTGG  
TGGTGGTGGTGGTGGAGGAGGAGGAAGTGGTGGTGGTATTGGTGGTGGCGCGGAGGGAGGTTATGACGTATTCGTGCTCTTTCCGGTGCCCTCTTCTGCTCCTCAGTCTCCTA  
ATTACTCCGGTGGTCTCCGATCACAGTCTTCTGTCTTCGTTGAGCAAGAGAAGTATCTTTCAGAGTTACTTGACAGAGCGTCATAAGCTTACTCCATTCTGCCTGTGCTTCCACAT  
GCATTTCCGGCTACTAAACCAAGAGATCTGTTCATCATCTCGGGACCAAATTGGCTTAACTCAGCTGGTAGTTTCGTCCGGTCTCATCGCAAGCGTACAATCAGGGTCGATATTC  
CAGTTCGACAAATTACCGAATTTCAATTTGTTGGTCTGCCTCTGGGCTAGAGAGAACTCCCTGAAGCGAGTTGAAGCAAGTACGATGCCGTGTTCTTTAAGAGGAAGAGGA  
AGTATAAAGATCTCAATTAAAGGAGGAATGATGAGAGGAAACCGGGATCAGGACCACTTAAGCACTCATATCTTAGTGGAGAGCAAGTTACCGATTGAAATAGTGCATGT  
ACGGCTCATGCAAGCTCGGGAATACTGACGATCTTCTTACTCCTATGGAGGAAACCCATGATATGTACAAGAAACAACAGCTGCGCGAGCTAGCATTTGCTCAATGGAACCTTTC  
GTGAAGAAGGATCTCCAATGTCGGTCTGTTTCTCCTTACAATAGCCTTGGTATGAAGAGAGCCAAAACAAGAGAAGGGTAAAAACCTCGAACAGTTTGGCTGTGATCATAAG  
CAATATGAACCGATCCAAAAGTCGACACAAAAAGGCCATACCACCTTTGACGACACGGTACTGTCTTGTCTTGGGGTAGAAATGTGTATATATGATTTATGAATGTGTTT  
GTCAGTCTATGTATCATTTGTCGGGAGAGAGATCAGATGACAAAATTGCAACGGAAACACAAGAGCTGATGAGTCTCTGTCTCTCCGAGACTTTGATTTGTTTTGTTTATGT  
TTTATAGTCTGGAAGATTGGGTTCCACAGAGTTTTCTTTAAGTTTTTGTATTGTTGTTTTAGCAAAAAGAAAACATTAAATCATGATGATGGTTTGTGTCTGGTATTGGTAA  
TGATAAATAATCAATATGTTTTGGATACA

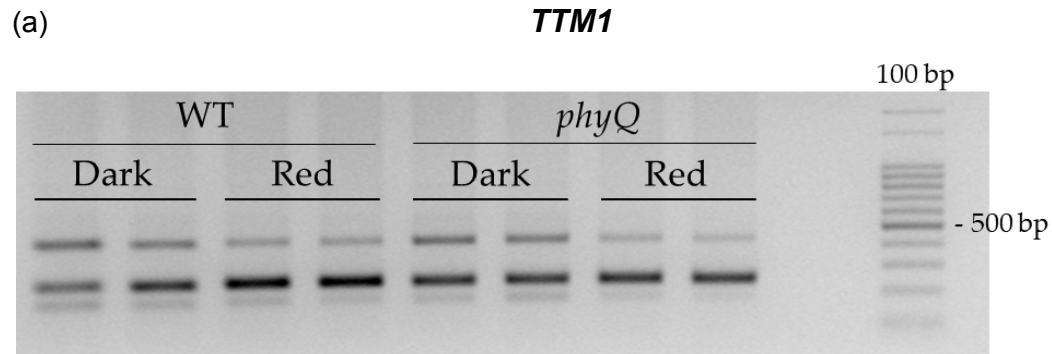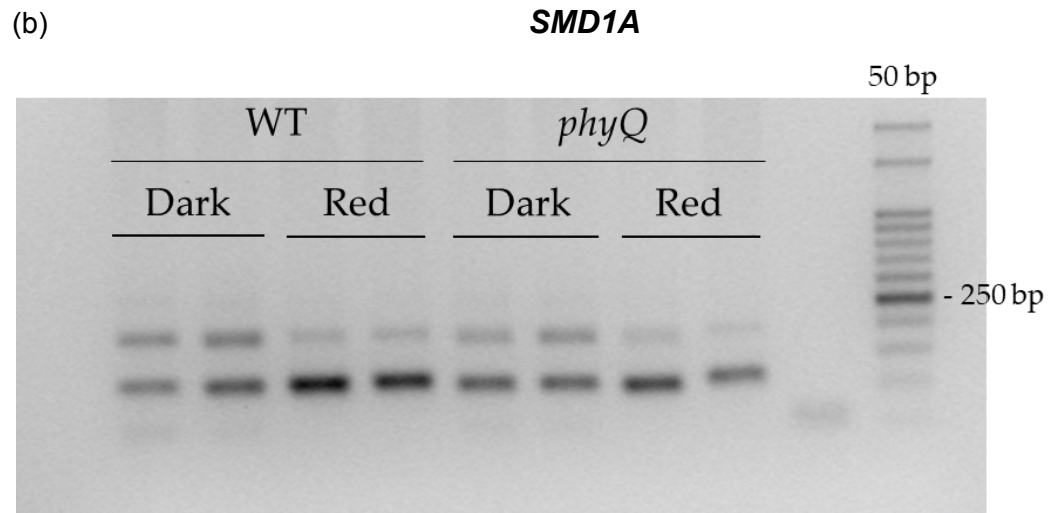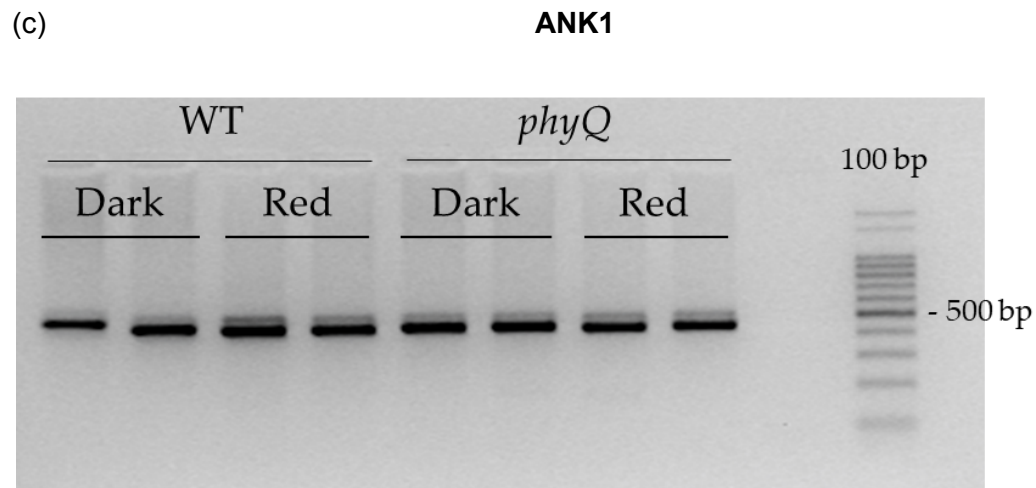

**Supplementary Figure S5:** Complete PCR electrophoresis gel of phy regulated genes. (a) *TTM1* (AT1G73980), (b) *SMD1a* (AT3G07590) and (c) *ANK1* (AT5G02620). Two biological replicates are shown side by side. The order of the samples is WT dark, WT red light, *phyQ* dark and *phyQ* red light. In all cases there is a 100pb ladder.

(a) >AT1G73980 TTM1 LONG ISOFORM

GTTTACTGTTTGAATTCTCTAGTGATTCTTGGTAAAGCTTCCGCTTCTCCTCTCCATCATCTTCTTACTCTCATTGACTGCTACGAAAATATCTCTCCAACATATTTCTTACTAT  
CGCTTCTGGGTTTCCCGAAAATATGGAATAATCTCCGGCGACGTTTTTCCCAATTTGACTCTTCTTCCGTTAGCCAAGTGTTTTAGAAAGTCGTGTGACGTAATATTAAAGCTCA  
AATCTTACATTTGGAGTGTGTGCATGTCAATTATTTCCACAGCTTCTGATGAATATTGATCGATCTTGTAAATTGAATGAAATTTCTGCTCATGCTTTGATTTGATTAGACTTAT  
ATCGTGGATTGATAGCTTCCAGATATTCTTCTTCATTTGCAACTTTGAGGCAATGGCGCTCGATAGTTCTGTTGCTCTGTCACCTCGCGGGCGGCATGGCTTGTTCGAGATCAGG  
TTCAGCTTATAAAAAAGAAAGGACTCTGGAAGATATGAGATAGTTCCAATAGAGGATCCATTGTCTTTGAAAAAGGTTTCTACGCTGTTATTCTGTGCTTGTCAATTATTGGCTCAG  
AAGAACGATGGGCTCATTGTGGTGGGTTAGCTGGTCTTCTGGAGCTGGCAAAACCATTCTCAATTTTATGCTAGTATTGCTATCATTAACATGGACAA  
CTATAATGATGGTACTCGTGTATCGATGGAACCTTTGATGATCCAAGGTTGACTGACTATGATACACTTCTTGACAATATACATGGTCTAAGGGATGGAACCTGTTCAAGGTTT  
CAATATATGACTTCAAGTCGAGTTCTCGAATAGGTTACAGAACGCTTGAGGTGCCTAGCTCTCGCATTTGTTATTCTAGAAGGCATATATGCTTTGAGTGAGAAGCTACGGCCTTTG  
CTAGATCTTCGTGCTCTGTCACCTGGTGGAGTGCATTTTATCTTGTAAAGCTGTTTTGCGGGACATTCAACGTGCTGGCCAGGAACCTGAAGAAATATCCATCAGATATCTGA  
GACGGTTTTTCATGCTAGTCTTTGCTATCTTTATTTTTTAGCCAGATTAATCACCTTGTCTGTCATGCTGCTGTTTGGAGTTGCTTCAATATGGAACCAACATGAAACGATGT  
CTCTACTCCTACTGGATGTTTTGAGTTTTTTTTTACAGTAAATTTTGTCTTATGTTTTTCTCCAACGAGTTTATCTATGTACAAGGCGTTTATGAACTGATCTGAAGAC  
AGCTCAGATTAAGATCCTTAATAAGTTCAACCCATTCAAGTGGCTTTCAGAACCAACATATATTTAAAGTCATCAAAGGCTGTAACACCCGAACAAATGAAGGCAGCTCTATCTG  
AAGATTTCAAGGAACGTACAGAGGAACTTATGACATCTATCTGTACCACAGGCGAGGATCCTGAAGCATGCCAATCATACCTCAGAATGAGGAACCGAGATGGAATAACAAT  
CTCATGTTTGAGGAGTGGGTTACAGATCGTCCATTTATTATATCACCCAGAATAAATTTGAAGTTAGTGTTCGCTCTTCTGGAGGATTAAATGGCACTGGGTTATACCATTTGCAAC  
AATCCTGAAAAAGAAAGAGTCATATCTTTGATGATGACAAGGTAATTTGTGAAAACCTGATTGGTTGGAACAACCTGAATCGGACATATGTACAGGTACAAGGTAAGACCGTACCTTTG  
TCAAAAAATGTGGCAGACCAACTTGAGCTGGAAGGTTTATATGTTCCACATACATATATTGAACAGATACAGCTGGAGAGGCTTGTGAATGATGTTTTGGCTTTGCCAGATGACTTA  
AAAAACAAACTTAGCTTAGATGATACAGTTTCTAGCCCTAAAGAAGCCCTCTCAAGAGCTTCTGTTGATAGTAGAATGAAATATCTTACGGCGCGCTATCAAAGTCTTACAC  
AAACCCAAAGACACAAAGTCTTGCTTAACCTTGACAAGACTTGTGTTAAACAATAGAATGTTAGATGCCAGAGCCCTGCTTACCGGCCACTCTTCCAAATCAGGGTTTTATCACTC  
AACTTTAGACCAAAATATCAACACTGAACGAGAGGATGGATGAATTCACATCCGCATTGAAGAGTTGAATTTCAAGATCCCGAACAGGATAGCTCTTTCAGGTAGTCAACATAAC  
TTGGCTTTACCAATCGAAACCGTAATGGGCTGTCTTATCATTTCCGCATCCGCATCTCAGCTCGTAAGGGAATCTCTCTGATGGAAGAGGTCGTACTGGTTGCTCGTGGACA  
GCGTCAGATAATGCATCAATGGACACACTGAGTAATCTTCTCGGGAGTATGTTGGAGAAAAGACTCGCATAGAGAGACTCGACAGCAGCAGAACAAACAGTACAACACAAAACC  
TCGAATCCTCTACTGTACCGATTCTTCTTGGTTTGGCCATTGGCTGTGTGGGCATCTTGCCTACAGTCGTCTGAAATAGTTGCTCTAACTGTGGAAACCCAGGCTTCGTGAAATA  
GTGGCAATGATGTAATAACATGGTTTGGGATACACACTGGACAAATTCAGTCTTGACAATGTAACATGTGCCAAGAATAAAAGACTGATTCTGTTCTTACCCTTTCAATCCGGTT  
CTTCTTCGTAACCAATAAATTTAAACCGCAACACATTTAACAGATTGACTATTTTTGGCTACTGATCAAAAAATGGAG

(b) >AT3G07590 SMD1a LONG ISOFORM

CTCTCACAGCGAAAGAAGGGTTTTGAGGGTTTTACACCTTTTCGCTGTTTCTCGTCAATTTCTTTGTTTGGTTGTTCTTTCTTCGCATCCAAAGATGAAGCTCGTCAGGTTTTTG  
ATGAAGTTAAACAATGAAACTGTGTCTATCGAGCTGAAGAATGGGACTGTGGTCCATGGAACCATCACTGGTCTTATACAAGTCGCGATCTGTTCCCTATTTTCAATTGGCCCTA  
ATCGCGTCTTGTGATCACATGAATAGGTGTTGATGTGAGCATGAACACTCACTTGAAGACAGTGAAGATGAGCCTGAAGGGGAAAAACCCAGTAACACTTGATCATCTTAGCTTG  
AGGGGTAAATAATTCGCTACTACATTTCTTCTGATAGCTTGAACCTCGAGACTTTACTTGTGGAAGACACTCTAGAGTTAAACCTAAGAAGCCTGTTGCTGGGAAAGCTGTTGG  
ACGCGGTCGCGGACGTGGCCGTGGGCGTGGTTCGCGGACAGAGGTCGTTAGATGTAGCAGCGCTCTGGAACATGTTGAAGGGATCACACGGGTAGGGATAGGAAGATGGCACACCATA  
TCCATCATGAGGCCATGGTTGATAACATGGCTCAGGTTTTGCCATGGTTGACAACATGGCTCAGGTTTTCTCTCTTCAAGTTTTCTCTCTTCGGGTTTTCTCTCTTCGGGTTTTCT  
TTTTCTTCTTCTGGCTTTTTGTCAACATCCTTAGGTGGTTCAACTTTAGCTACGCTAACAAGCTCCGCAATGCAACTTTTTTC

(c) >AT5G02620 ANK1 SHORT ISOFORM

TGGACACTAAGGTTTGATCATGTGTTGTTTGTGTTATTAAGATAGTTTTAAGATATGTCTATGTGATATAACACAAGCAGCCAAAACCACGAGCATAGTTAAGAGGTAATAATATA  
TTTTGTTGTTTCTTGTCCAGAGAATTCATGTTACTCTTGTCTGAATCTTCTCAAATCTACTCATGTAGACCTCCCTATCTCGATCTAAATTTCCGCCAAACTTTTTTAATCCCA  
AAGATTTCTTAAACAGAATCATCATCAATCATGAAAGAGATCAAGAAGACGATGACGAAGCAGATGACGGCAAGACGTGACGACACGCCGTTACACACGGCGGTTAGAGAAGGCAA  
AACGGACCTTCTTTTGGAGATGATCGGAGAACACGACGGCGTGGAGCTGAAAGAGTTGTTGGCCGAGCAAAACCAGTCCGGTGAAACGGCTTTGTACGTTGCGGCTGAGTACGGTT  
ACACCGACATGGTTAAGATTCTGATGAAACACTCCGACTCTGTCTTAGCCGGAACCAAAGCCAAGAAGCGCTTCGATGCCTTTCACATCGCCGCCAAAACGGAAATCTACAGGTT  
CTTGATGTGTTAATAGAGGCAAAATCCAGAACTCTCATTTACATTTGATTATCCAAAACCACGGCGCTTCATACCGCGGCTTCACAGGGTCATGGAGAGATTGTTTGTCTTCTGTT  
GGATAAAGGTGTGGACTTAGCTGCTATTGCGAGAAGCAATGGTAAACCGCTTTCGACTCTGCAGCTAGGAACGGGCACACGGTGATTGTGAAGAAGTTGATTGAAAAGAAGGCTG  
GTATGGTTACAAGAGTCGACAAGAAAGGTCAAACCGCTCTCATATGGCGGTTAAAGGACAAAACACTGAGATTGTGGATGTGTTGATGGAAGCAGATGGTTCTGTTGATCAATTCC  
CGGATAATAAAGGAAACACTCCATTGCATATAGCAGTCCGTA AAAACAGAGCAGGTAATCGTTGATCAATCTTTAAGTTATTCTTGTGAGAAGTTAGAATCTTTCTTGTA  
TTCTTTCGAGATTGTTGAGAGGTTTAAAGTATTGTGAAGTCAGTAGAGTGGCGGTTAATAAATCAGGAGAACAGCTCTTGATATCGCTGAGAAAACCGGACTACATGAGATCG  
TACCTGCTTCTGCAAAAGATCGGTATGCAAGACGCAAGATCCATCAAGCCAGCTGAAAAAGTGGAACCATCAGGCTCTTCTAGGAAACTGAAAGAAACAGTATAGTGAATAGGCCAT  
GAGGTGCATACTCAGCTTGAACAAACCGGAGAACGAGAAGAGATCCAAGGAATCGCTAAACGGGTCAACAAATGCACACGGAAGGACTCAACAACGCGATAAACTCCACTAC  
CCTAGTAGCCATTCTCATAGCAACCGTTGCTTTTGCAGCTATCTTCAACGTTCCAGGCCAGTACACGGACGACCTTAAAGACGTACCTCCAGGATATTCACTCGGAGAAGCAAGAG  
CAGCTCCAAGACCCGAGTTCTTGATATTCTGTCGTGTTGATTCTTTCGCGCTTTTCATCTCTTTAGCGGTGGTTGTGGTTTCAGACATCAGTGGTGGTTATAGAGAGGAGAGCAAAG  
AAGCAAATGATGGCTATAATCAACAAGCTCATGTGGATGGCTTGCAATTATGATCTCAGTAGCGTTTCGATACACTGTCTTTTGTGTGCTGGGAGAGAAAGAGAAGCCTTTGGCGGT  
TGGAGTAACCGCCATTGGAGCTTTGATCATGGTTTCAACACTAGGGACTATGTGTTATTGGGTGATTGCTAACCAGGATTGAAGGATCTAAGTCATCTCCAGCTTCCATGATGTGAG  
ATCCTGAGTTAGCTGATTCAAACATAAACCGGAACTTTATGCGGTTTGATTAGAGTGAAACAGAGGATTAGAAAAATCATTAAAGAACAGAGAGATTTGTATCCAGATAATAAA  
AGAGATAACTCTTGTGTTTATAGTAGATTCTGTATATGTAACAAAAGGGAATAGTATAAATCAATTTATAAGACTTTTACATGATAAATCATCAATGTTGACTTTGACTAGAGTC  
AACAAAAATGACGATGCCATACAAAGAACAAGG

>AT5G02620 ANK1 LONG ISOFORM

TGGACACTAAGGTTTGATCATGTGTTGTTTGTGTTATTAAGATAGTTTTAAGATATGTCTATGTGATATAACACAAGCAGCCAAAACCACGAGCATAGTTAAGAGGTAATAATATA  
TTTTGTTGTTTCTTGTCCAGAGAATTCATGTTACTCTTGTCTGAATCTTCTCAAATCTACTCATGTAGACCTCCCTATCTCGATCTAAATTTCCGCCAAACTTTTTTAATCCCA  
AAGATTTCTTAAACAGAATCATCATCAATCATGAAAGAGATCAAGAAGACGATGACGAAGCAGATGACGGCAAGACGTGACGACACGCCGTTACACACGGCGGTTAGAGAAGGCAA  
AACGGACCTTCTTTTGGAGATGATCGGAGAACACGACGGCGTGGAGCTGAAAGAGTTGTTGGCCGAGCAAAACCAGTCCGGTGAAACGGCTTTGTACGTTGCGGCTGAGTACGGTT  
ACACCGACATGGTTAAGATTCTGATGAAACACTCCGACTCTGTCTTAGCCGGAACCAAAGCCAAGAAGCGCTTCGATGCCTTTCACATCGCCGCCAAAACGGAAATCTACAGGTT  
CTTGATGTGTTAATAGAGGCAAAATCCAGAACTCTCATTTACATTTGATTATCCAAAACCACGGCGCTTCATACCGCGGCTTCACAGGGTCATGGAGAGATTGTTTGTCTTCTGTT  
GGATAAAGGTGTGGACTTAGCTGCTATTGCGAGAAGCAATGGTAAACCGCTTTCGACTCTGCAGCTAGGAACGGGCACACGGTGATTGTGAAGAAGTTGATTGAAAAGAAGGCTG

GTATGGTTACAAGAGTCGACAAGAAAGGTCAAACCGCTCTTCATATGGCGGTTAAAGGACAAAACACTGAGATTGTGGATGTGTTGATGGAAGCAGATGGTTCGTTGATCAATTCC  
 GCGGATAATAAAGGAAACACTCCATTGCATATAGCAGTCCGTAAAAACAGAGCAGAGATTGTTTCAGACAGTTTTAAAGTATTGTGAAGTCAGTAGAGTGGCGGTTAATAAATCAGG  
 AGAAACAGCTCTTGATATCGCTGAGAAAAACCGGACTACATGAGATCGTACCGCTTCTGCAAAAGATCGGTATGCAGAACGCAAGATCCATCAAGCCAGCTGAAAAAGTGAACCAT  
 CAGGCTCTTCTAGGAACTGAAAGAAACAGTTAGTGAAATAGGCCATGAGGTGCATACTCAGCTTGAACAACCGGGAGAACGAGAAGAGAGATCCAAGGAATCGCTAACCGGGTC  
 AACAAAATGCACACGGAAGGACTCAACAACGCGATAAACTCCACTACCTAGTAGCCATTCTCATAGCAACCGTTGCTTTTGCAGCTATCTTCAACGTTCCAGGCCAGTACACGGA  
 CGACCCATAAGACGTACCTCCAGGATATTCACCTCGGAGAAGCAAGAGCAGCTCCAAGACCCGAGTTCTTGATATTCGTCGTGTTTGATTCTTTCGCGCTTTTCATCTCTTTAGCGG  
 TGGTTGTGGTTCAGACATCAGTGGTGGTTATAGAGAGGAGAGCAAGAAGCAAATGATGGCTATAATCAACAAGCTCATGTGGATGGCTTGCAATTATGATCTCAGTAGCGTTTCGTA  
 TCACTGTCTTTTGTGTCGTGGGAGAGAAAGAGAAGCCTTTGGCGGTTGGAGTAACCGCCATTGGAGCTTTGATCATGGTTTCAACACTAGGGACTATGTGTTATTGGGTGATTGC  
 TAACCGGATTGAAGGATCTAAGTCATCTCCAGCTTCCATGATGTCAGATCCTGAGTTAGCTGATTCCAAACATAACCGGAAACTTTATGCGGTTTGATTAGAGTGAACACAGAGGAT  
 TTAGAAAATCATTAAAGAACAGAGAGATTTGTATCCAGATAATAAAAGAGATAACTCTTGTTGTTTATAGTAGATTCTGTATATGTAACAAAAGGGAAATAGTATAAATCAATTTA  
 TAAGACTTTTACATGATAAATCATCAATGTTGACTTTGACTAGAGTCAACAAAAATGACGATGCCTATACAAAGAACAAGG

**Supplementary Figure S6:** Effect of splicing on the open reading frame of selected phytochrome-regulated genes. Effect of splicing on the open reading frame of selected light regulated genes. 5' UTR is colored in green, CDS in blue and 3'UTR in purple. The different shades indicate different exons. The additional sequence retained in the non-canonical AS isoform is colored white. Stop codons are shown in red and underlined.

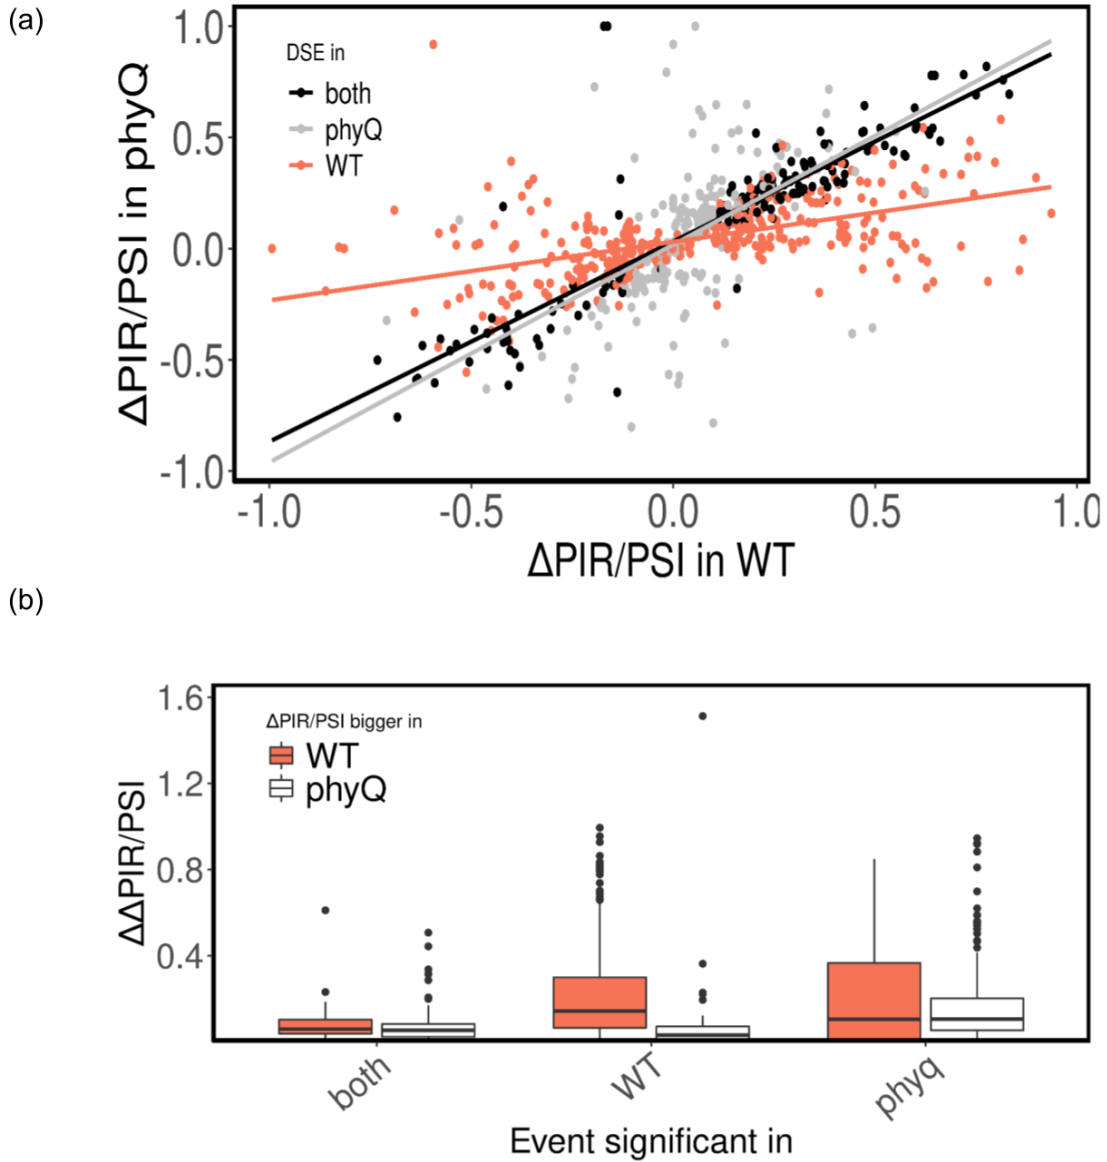

**Supplementary Figure S7:** Distribution of dPIR/PSI in each subset of differentially spliced events. (a) Relationship between  $\Delta\text{PIR/PSI}$  values from the contrasts WT dark vs WT red light (x axis) and *phyQ* dark vs *phyQ* red light (y axis). Events are colored black if they were differentially spliced in both contrasts, orange if they were differentially spliced only in the WT contrast, and gray if they were differentially spliced only in the *phyQ* contrast. The trend lines resulting from a linear regression over the three subsets of DSEs are shown. (b) Boxplot of  $\Delta\Delta\text{PIR/PSI}$  calculated as  $|\Delta\text{PIR/PSI}_{\text{WT}} - \Delta\text{PIR/PSI}_{\text{phyQ}}|$  for DSEs in both contrasts (both), only in the contrast WT dark vs WT red light (WT), and only in the contrast *phyQ* dark vs *phyQ* red light (phyq) (x axis). In each category, the events are grouped depending on the contrast with the biggest  $\Delta\text{PIR/PSI}$ . When  $\Delta\text{PIR/PSI}_{\text{WT}} > \Delta\text{PIR/PSI}_{\text{phyQ}}$ , events are grouped in the orange box, and when  $\Delta\text{PIR/PSI}_{\text{WT}} < \Delta\text{PIR/PSI}_{\text{phyQ}}$ , events are grouped in the white box.

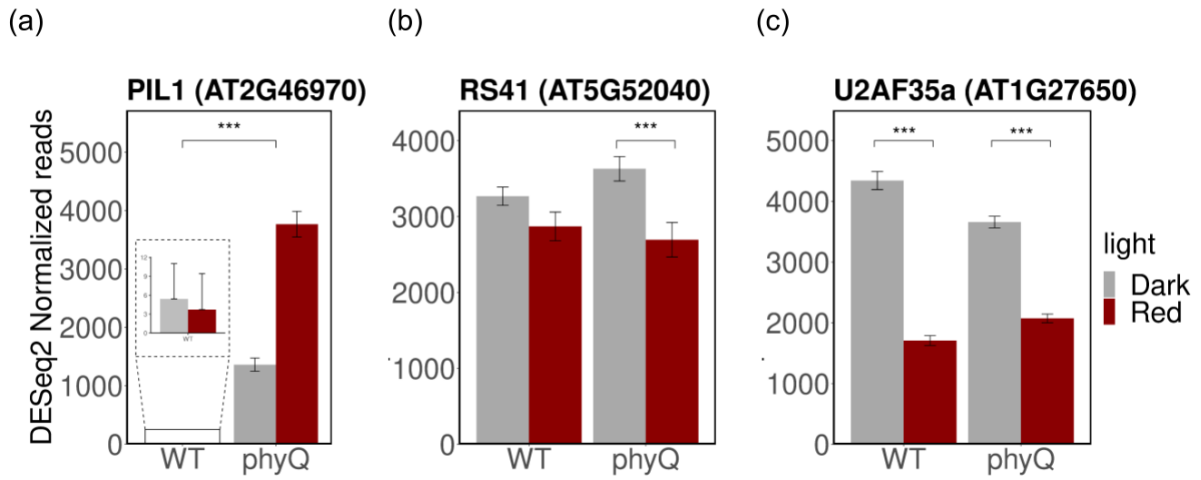

**Supplementary Figure S8:** Genes that display altered expression patterns in the *phyQ* mutant. Normalized read count values of (a) *PIL1* (AT2G46970), (b) *U2AF<sup>35</sup>a* (AT1G27650) and (c) *RS41* (AT5G52040). The mean value and standard deviation of three independent biological replicates is shown. \*\*\*: FDR<0.001.

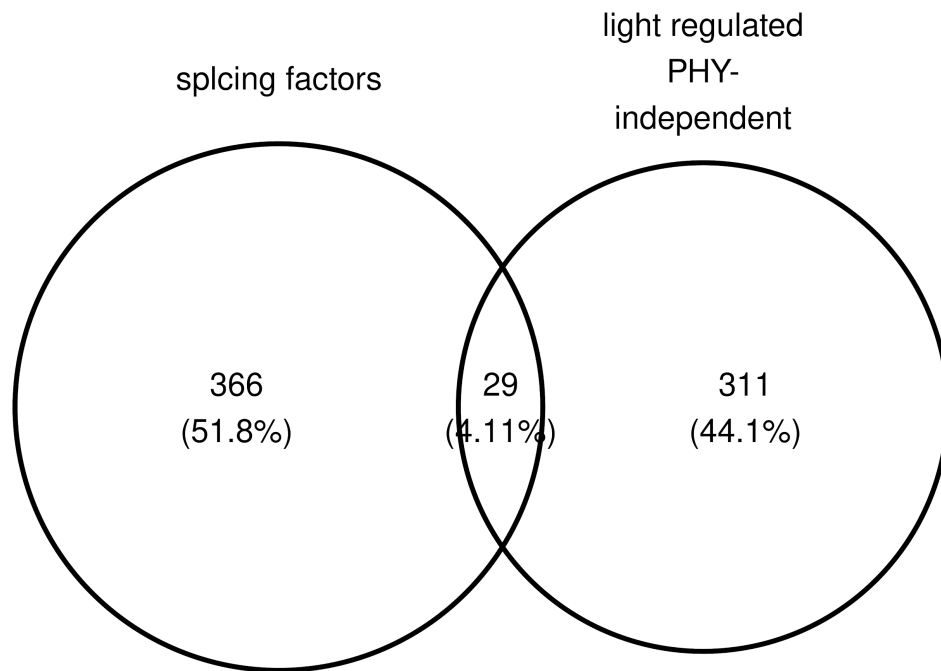

**Supplementary Figure S9:** Overlap between the DSGs in the *phyQ* mutant and splicing regulatory factors. The list of splicing regulatory factors was taken from Shikata *et al.* (2014). The light regulated phy-independent genes were defined as the DSEs between *phyQ* Dark and *phyQ* red light (Figure 1C).

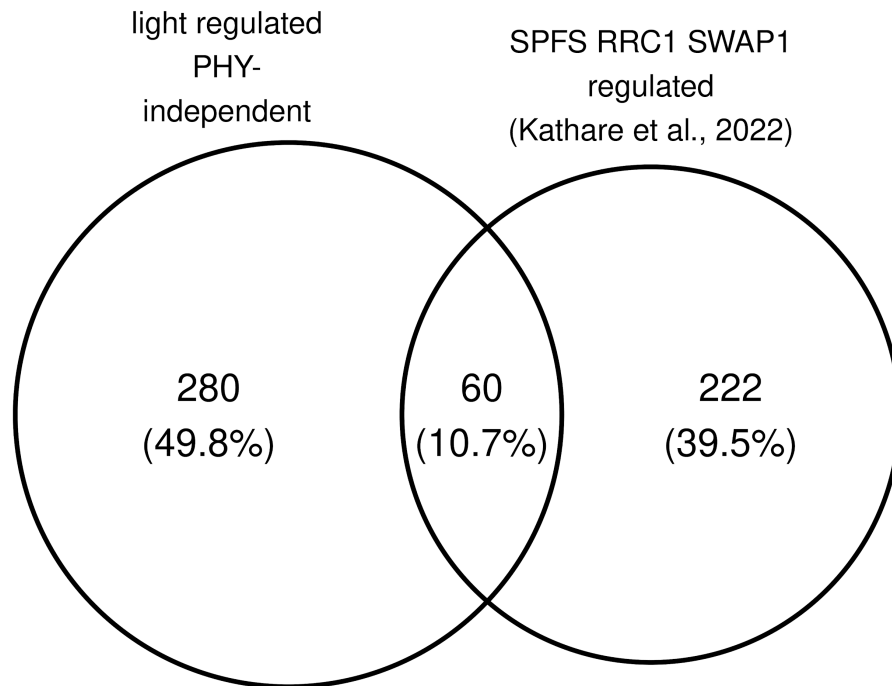

**Supplementary Figure S10:** Overlap between the DSGs in the *phyQ* mutant and DSGs regulated by the splicing factors SPFS-RRC1-SWAP1 (WT vs *spfs rrc1 swap1*) upon R light treatment. The lists of DSGs were taken from Kathare *et al.* (2022). The light regulated phy-independent genes were defined as the DSEs between *phyQ* Dark and *phyQ* red light (Figure 1C).
